# Supplementary material
Source: publisher figshare collection journal article supplement (https://sage.figshare.com/ndownloader/files/22896983)

Figure 1. Forest plot of the cervical range-of-motion at follow-up.
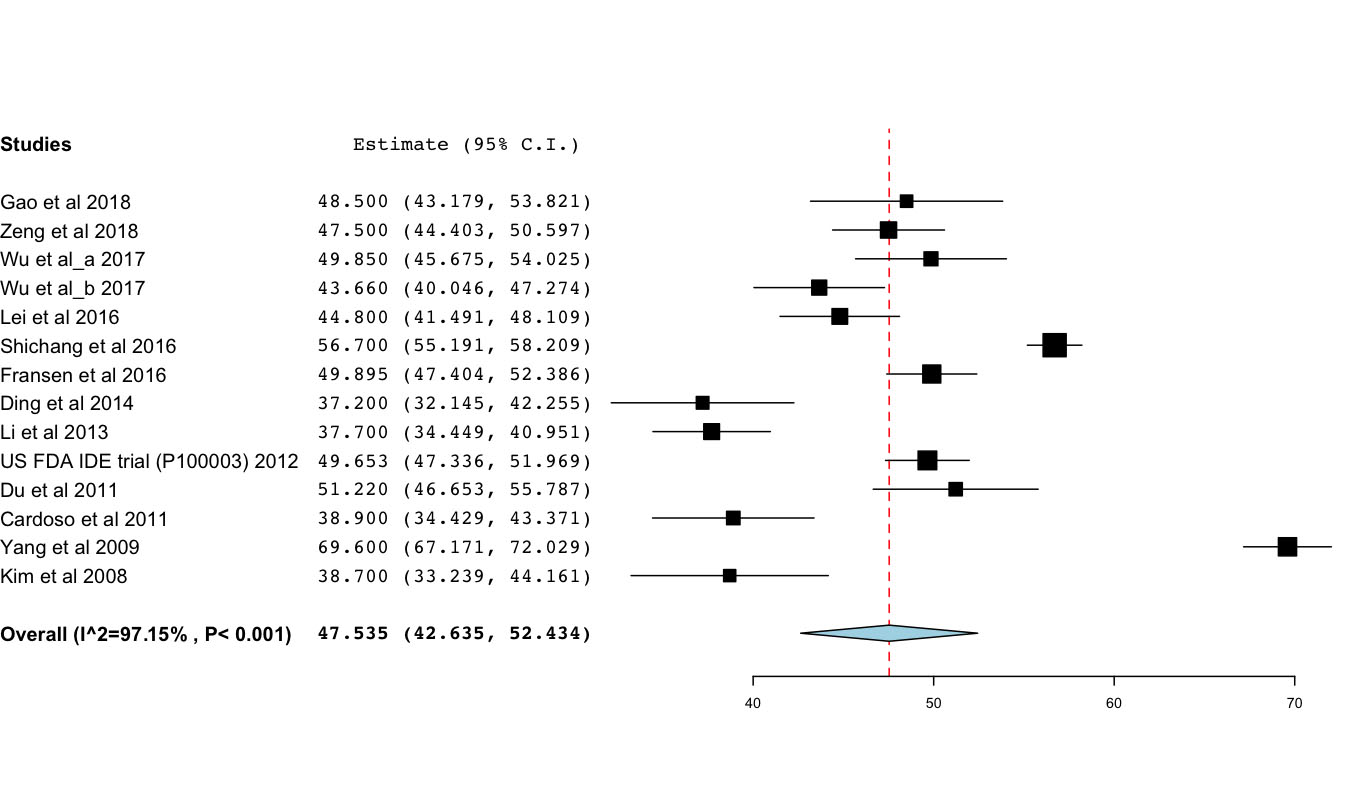


Figure 2. Forest plot of the C2/C7 Cobb angle at follow-up.
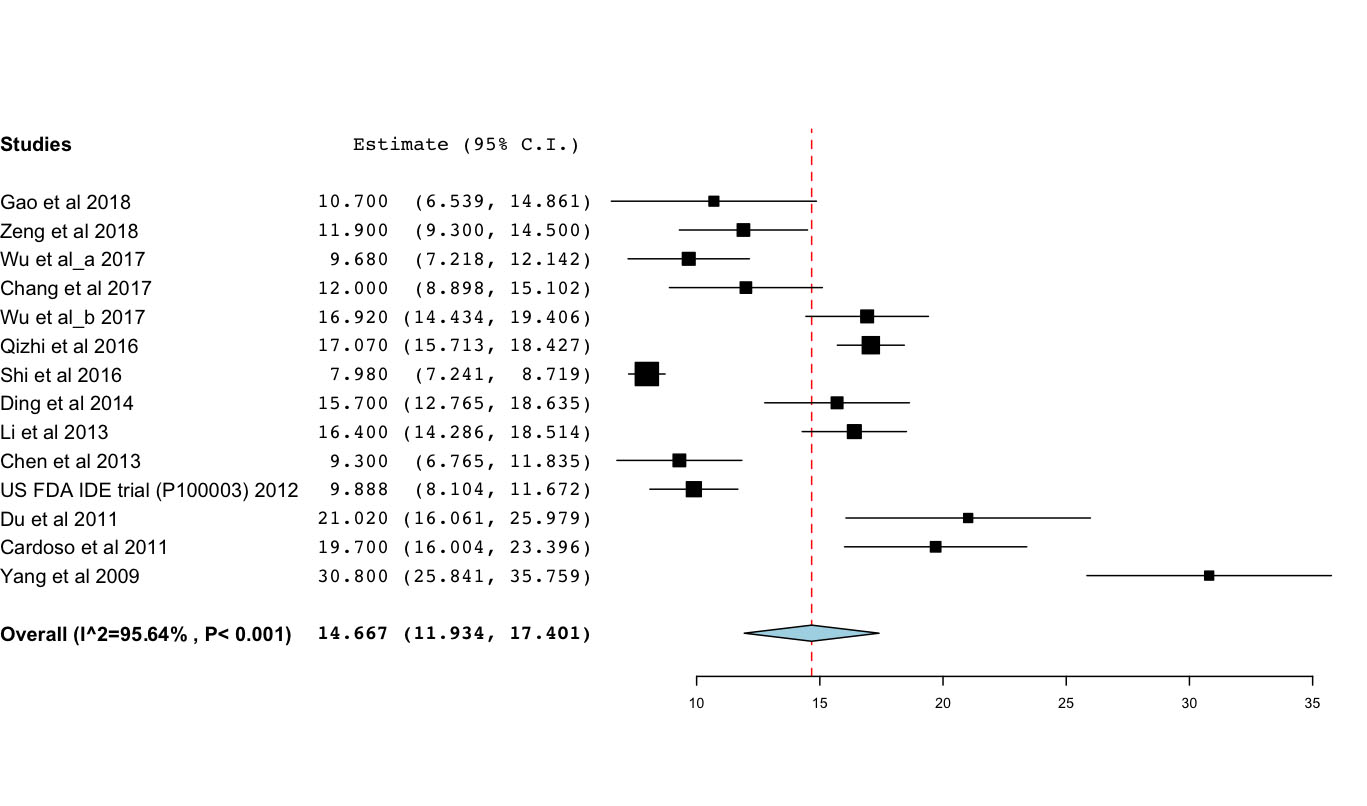


Figure 3. Forest plot of the functional spinal unit angle at follow-up.
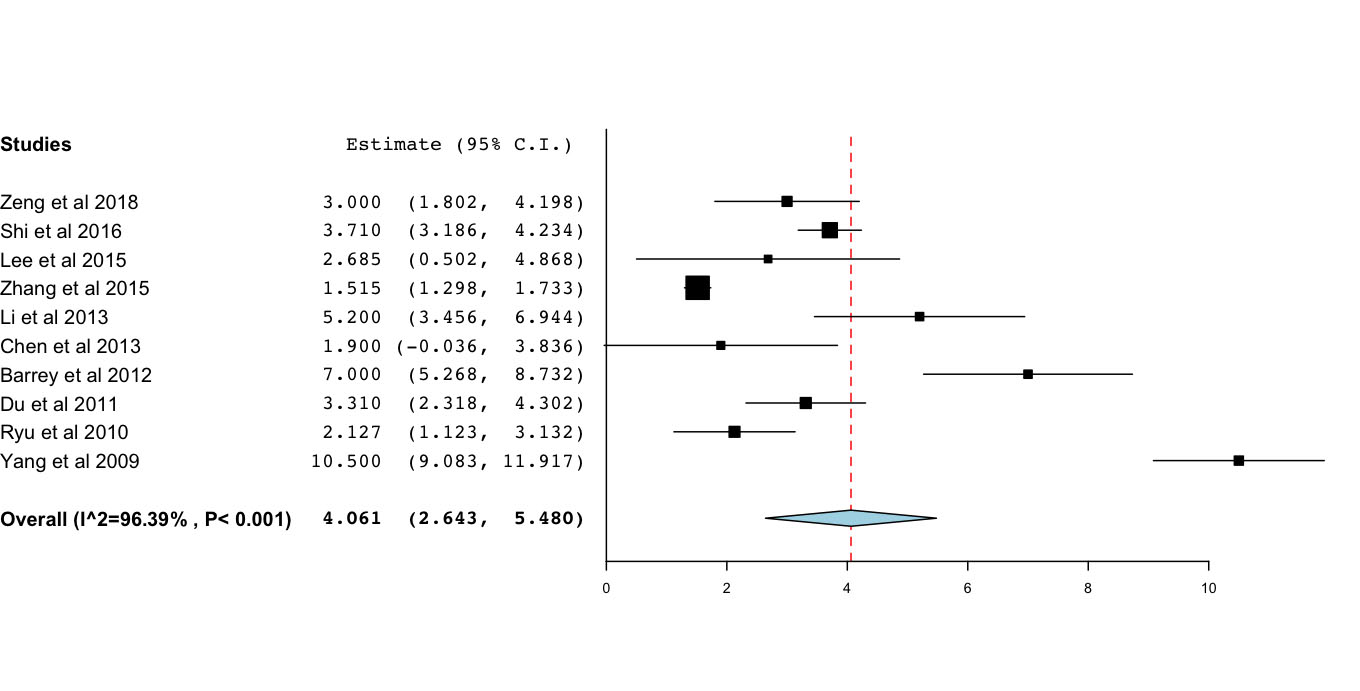


Figure 4. Forest plot of the functional spinal unit range-of-motion at follow-up.
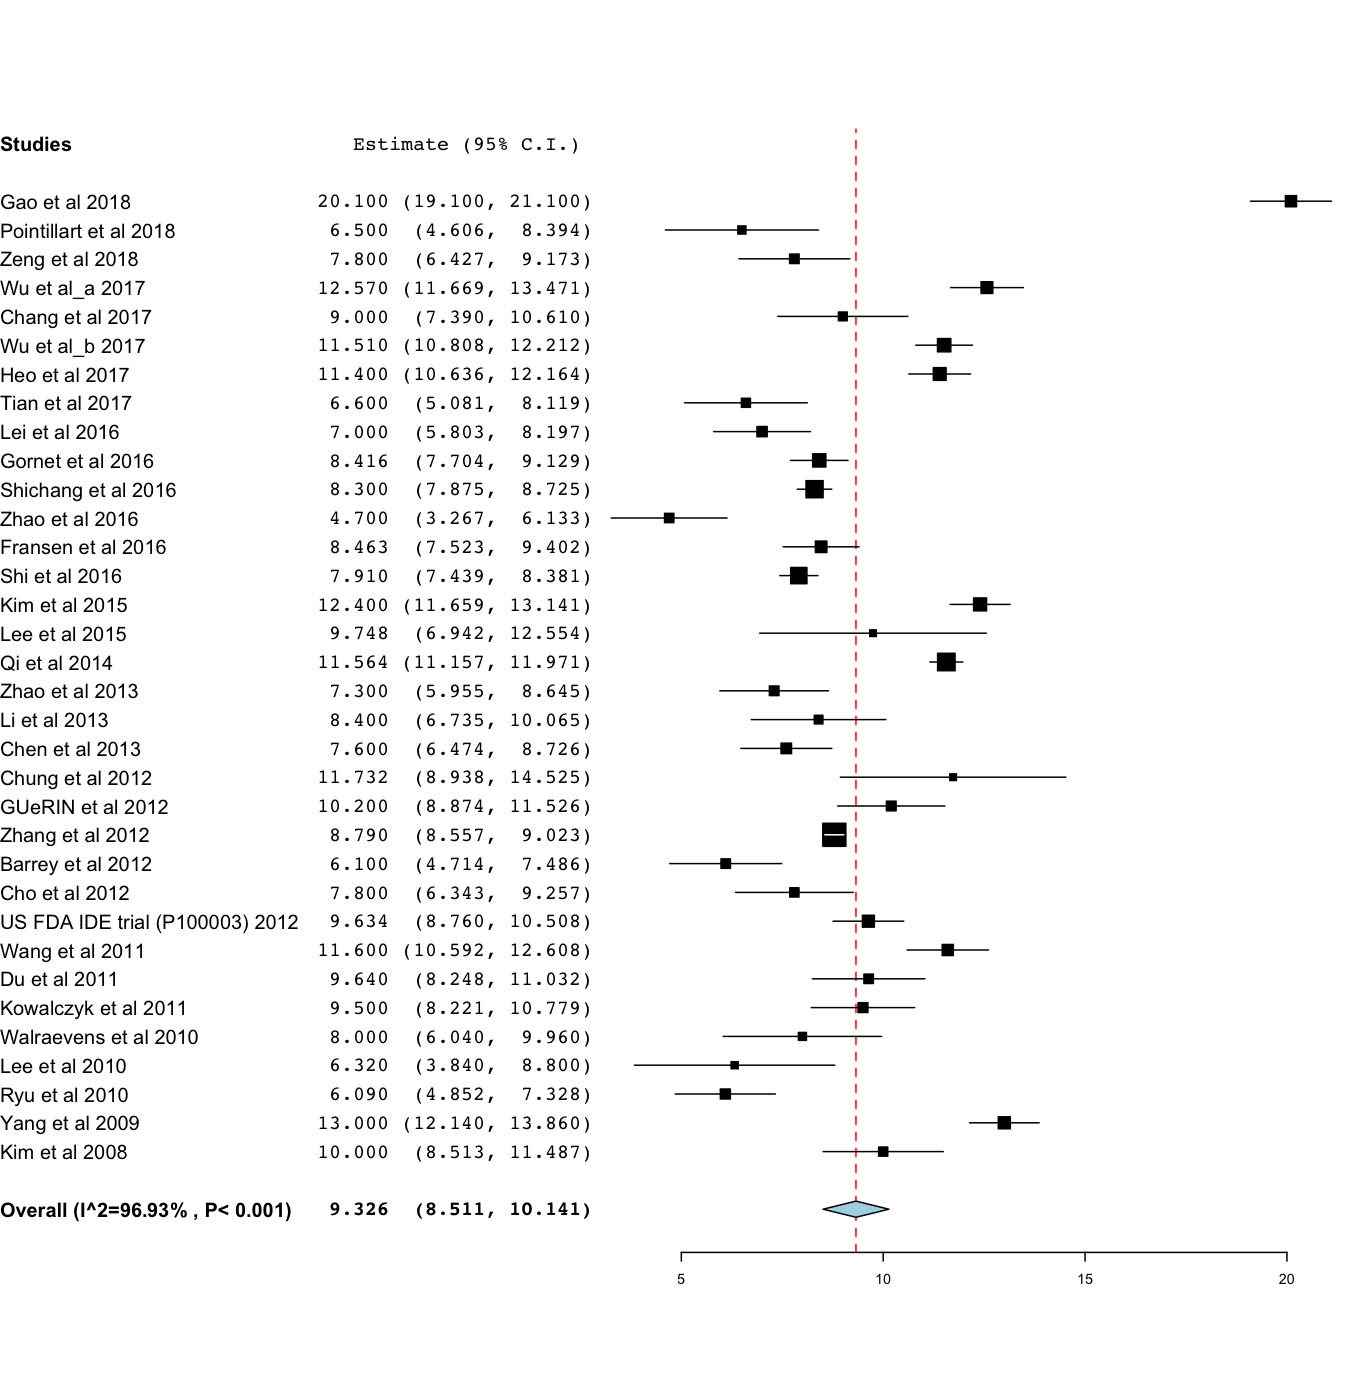


Figure 5. Forest plot of the range-of-motion of the inferior spinal segment at follow-up.
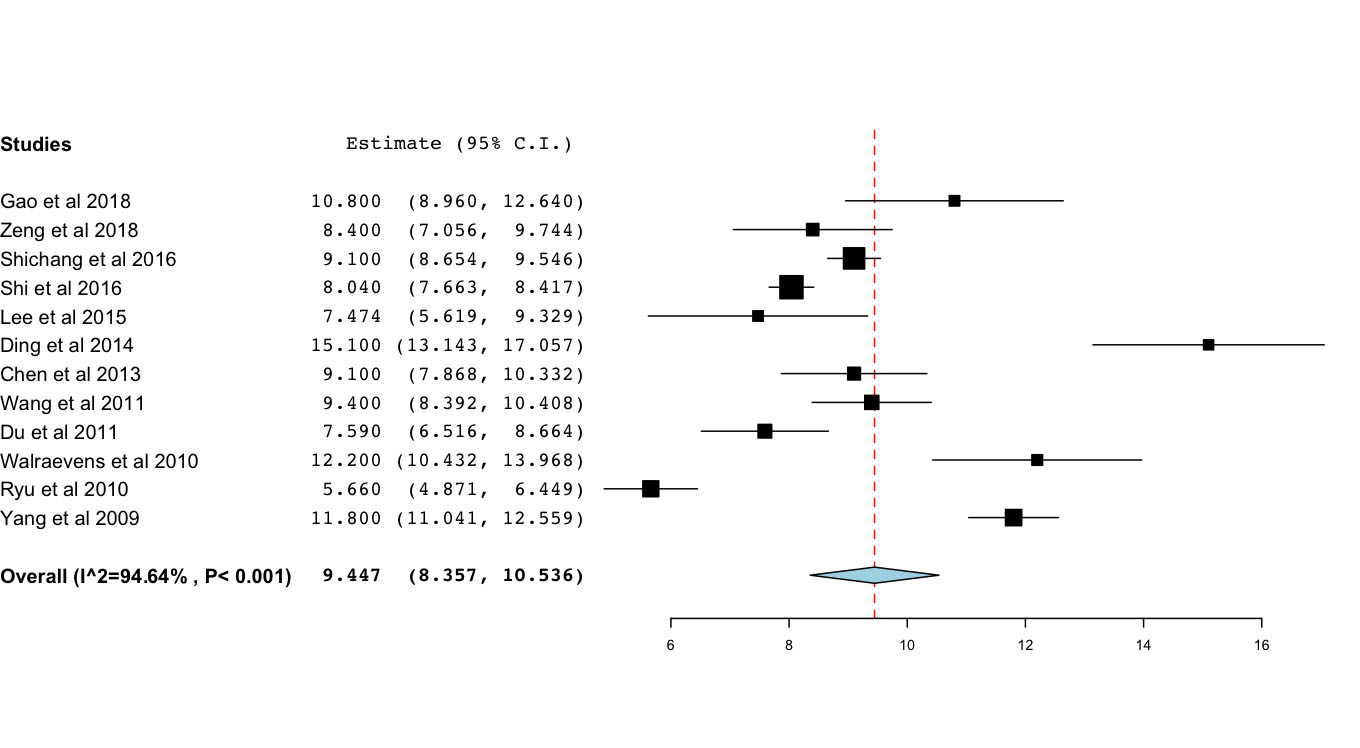


Figure 6. Forest plot of the range-of-motion of the superior spinal segment at follow-up.
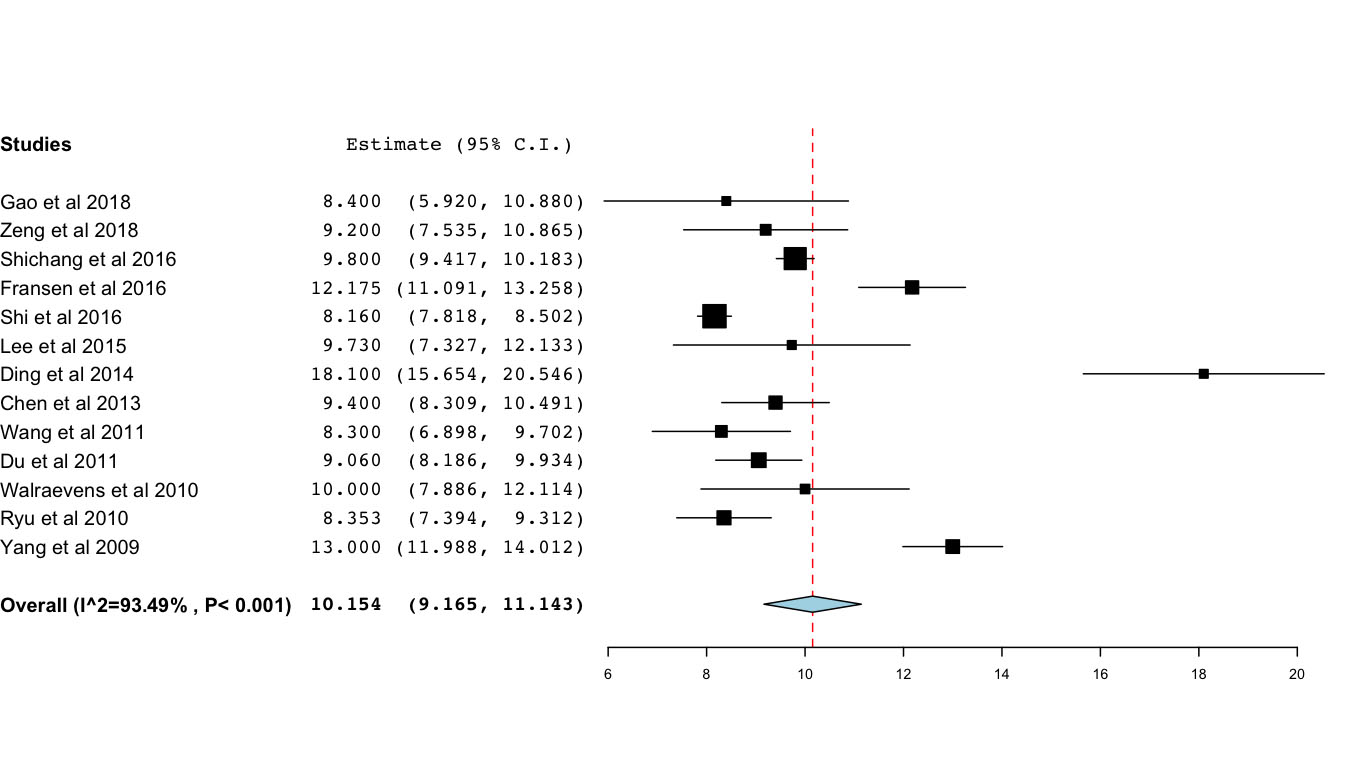

Supplement: Supplementary file 1 [file 22896983]
